# Supplementary material
Source: ML conference proceedings conference paper supplement (https://aclanthology.org/2026.semeval-1.54)
Supplement: SupplementaryMaterial [file architecture.pdf › architecture.pdf]

Input Syllogism

Premise Retrieval(ST2/ST4 only):  
Deepseek + Keyword Fallback

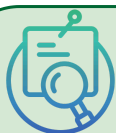

### Layer 1: Regex Rule System (ST1 only)

Regex Passing  
A/E/I/O types

Mood + Figure  
Computation

24 Valid Forms  
Lookup tables

**Valid/  
Invalid**

*fail*

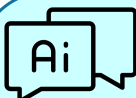

### Layer2: LLM Symbolic Passing (Deepseek-V3.2)

LLM Passing  
JSON (types, subjects,  
predicates)

Mood + Figure  
Fuzzy Term  
Matching

24 Valid Forms  
Lookup tables

**Valid/  
Invalid**

*fail*

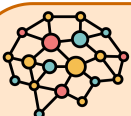

### Layer3: Neural Model Ensemble (Fallback)

DeBERTa-v3-large + LoRA  
ST1 / ST2 (English)

XLM-RoBERTa-large + LoRA  
ST3 / ST4 (Multilingual)

**Valid/  
Invalid**
