# Supplementary material
Source: ML conference proceedings conference paper supplement (https://aclanthology.org/2026.semeval-1.54)

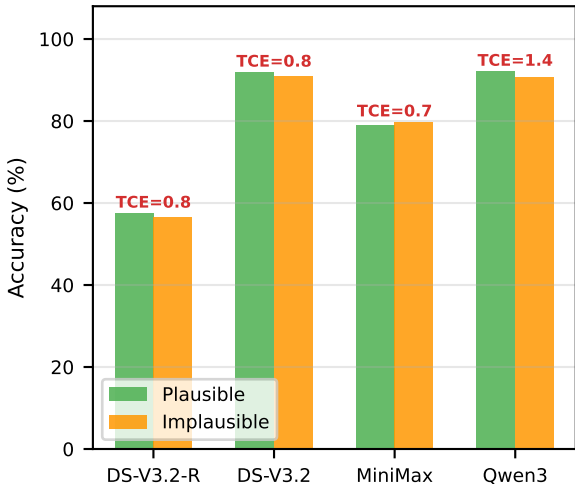

Supplement: SupplementaryMaterial [file content_effect.pdf › content_effect.pdf]

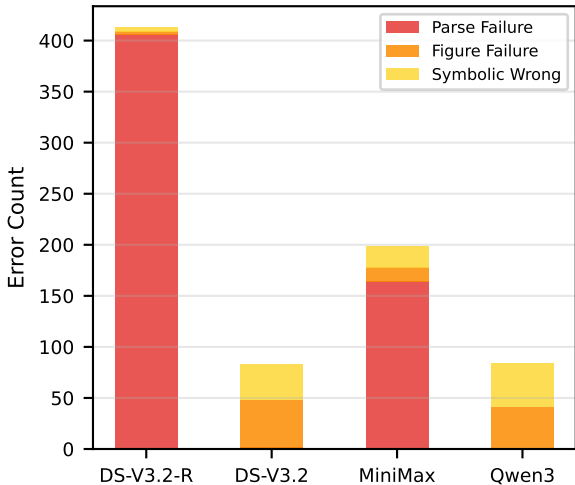

Supplement: SupplementaryMaterial [file error_breakdown.pdf › error_breakdown.pdf]

**DS-V3.2-Reasoner**  
**Acc=56.98%**

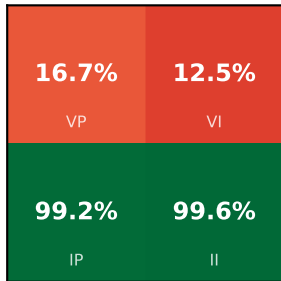

**DS-V3.2**  
**Acc=91.35%**

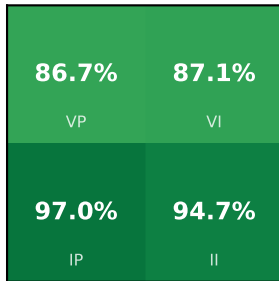

**MiniMax-M2.5**  
**Acc=79.27%**

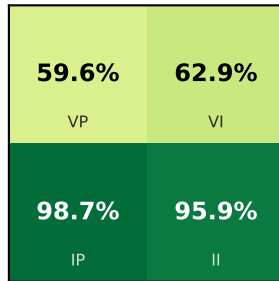

**Qwen3-Max**  
**Acc=91.25%**

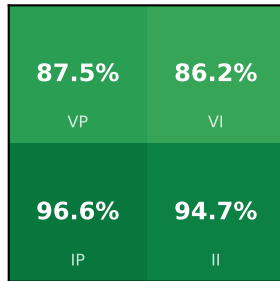

Supplement: SupplementaryMaterial [file quadrant_heatmap.pdf › quadrant_heatmap.pdf]
